1 **Title:**

2 **Theoretical derivation and clinical validation of the**  
3 **resolution limit of human eye to spherical lens change: A Self-**  
4 **controlled Study**

5 **Authors' names:**

6 Zhen Yi<sup>1</sup> M.D, Gao Jie<sup>1</sup>, Cao Kai<sup>1</sup> PH. D, Shen Jing<sup>1</sup> PH. D, Zhang wei<sup>1</sup> PH. D, Dai Yun<sup>2</sup> PH. D

7 **Author's affiliation:**

8 1 National Engineering Research Center for Ophthalmology, Beijing Institute of Ophthalmology,  
9 Beijing Tongren Hospital, Capital Medical University, Beijing, China. No.1 Dongjiaominxiang,  
10 Dongcheng, Beijing, China 100730

11 2 Ineye Hospital of Chengdu University, Chengdu, China. No. 8, Xinghui West Road, Jinniu District,  
12 Chengdu, China 610084

13 **Name and address for correspondence:** Zhen Yi

14 ● E-mail address: [dr\\_zhenyi@163.com](mailto:dr_zhenyi@163.com)

15 ● Telephone number: (+086)10 58265922

16 ● Fax number: (+086)10 58265922

17 ● Full postal address: No.1 Dongjiaominxiang, Dongcheng, Beijing, China 100730

18 **[Synopsis/Precis]:** The resolution limit of human eye to spherical lens change is about 0.05D and  
19 better corrected visual acuity can be obtained by adjusting the spherical power at an interval of  
20 0.05D than 0.25D.

21

**NOTE: This preprint reports new research that has not been certified by peer review and should not be used to guide clinical practice.**

22 **[Abstract]**

23 **Background/Aims:** To deduce theoretically and verify the resolution limit of human eye to  
24 spherical lens change for more reasonable design of the trial lenses. **Methods:** First, the resolution  
25 limit of discernible change in spherical power was derived based on the optical model. Then, the  
26 volunteers were observed to see if they could perceive the changes in spherical power as per the  
27 resolution limit and compare the difference in the best corrected visual acuity obtained with the  
28 resolution limit and interval of 0.25D. **Results:** Assuming that the cone cell diameter is 3  $\mu\text{m}$  and  
29 the pupil diameter of 4 mm, the theoretically resolution limit was 0.05D. When the diopter of  
30 spherical power was increased, the ratios of ability to perceive 0.05D spherical lens change were  
31 98.3% and 96.7% in right and left eyes. When the diopter of spherical power was decreased, the  
32 ratios of ability to perceive 0.05D spherical lens change were 78.9% and 83.2% in right and left  
33 eyes. The best corrected visual acuity obtained with the 0.05 D interval trial lens was significantly  
34 better than in the 0.25 D interval on both eyes (Right eye  $-0.04\pm 0.07$  vs  $-0.02\pm 0.06$ ,  $t=6.729$ ,  
35  $P<0.001$ ; Left eye  $-0.07\pm 0.06$  vs  $-0.04\pm 0.06$ ,  $t=8.825$ ,  $P<0.001$ ). **Conclusion:** The resolution limit  
36 of human eye to spherical lens change was about 0.05D and the better corrected visual acuity can  
37 be obtained by adjusting the spherical power at an interval of 0.05D.

38 **[Key words]** Spherical lens; resolution; limit value; red-green Duochrome balance test

39

40 **What is already known on this topic** - At present, the spherical power is generally adjusted at  
41 0.25D for optometry. In clinical practice, we find that a more than 80% of myopia patients with  
42 clear red prototypes will directly see clear green in case of a decrease by 0.25D, unable to achieve  
43 the red-green balance.

44 **What this study adds** – More than 80% of myopia patients can perceive the changes in spherical  
45 power as per 0.05D.

46 **How this study might affect research, practice or policy** - Adjusting the spherical power per 0.05  
47 D can help us to achieve a higher full correction rate ( $>80\%$ ) and realize better visual acuity.

48

## 49 **Introduction**

50 In the information age, the prevalence of myopia among adolescents is increasing year by year,  
51 evidenced by up to 80% of myopia among Chinese high school students. Frame glasses are still the  
52 main method for myopia correction. Previous studies have shown that overcorrection or  
53 undercorrection will lead to the accelerated progression of myopia. Spherical-power full correction  
54 is recommended for adolescent myopia<sup>[1 2]</sup>. The red-green Duochrome test is an important step in  
55 subjective refraction, and a method to determine the maximum plus to maximum visual acuity  
56 (MPMVA)<sup>[3]</sup>. At present, the spherical power is generally adjusted at 0.25D for optometry. In clinical  
57 practice, we find that a considerable proportion of patients with clear red prototypes will directly  
58 see clear green in case of a decrease by 0.25D, unable to achieve the red-green balance. In order to  
59 avoid overcorrection, the prescription of optometry often chooses the diopter of undercorrection  
60 with clear red prototypes.

61 From the middle of the 19th century to the early 20th century, the interval of spherical-power trial  
62 case lenses was reduced from 1D to 0.25D and has been used up to now. However, we have not  
63 found the theoretical basis for setting the interval at 0.25D, which may be related to the cost of lens  
64 manufacturing at that time. In order to determine the adjustment interval of spherical-power lens  
65 more scientifically and reasonably and help patients get better visual quality, this study firstly  
66 calculated the theoretically derived resolution limit of human eye to spherical lens change based on  
67 the optical model, and then observed the actual resolution values of volunteers to compare the two  
68 for any consistency.

## 69 **Materials and Methods**

### 70 **Calculation of the theoretically derived resolution limit of human eye to spherical lens change**

71 Let the diopter of a human eye optical model be  $A$  (D), the diameter of human cone cell  $B$  ( $\mu\text{m}$ ),  
72 and the pupil diameter  $x$  (mm). As shown in Fig. 1, the parallel light passes through the optical  
73 model of human eye and forms a focus spot on the image plane (retina), exciting one cone cell only.  
74 When the spherical lens with diopter  $y$  is decreased in front of the model, the focus moves back to  
75 the retina, and the parallel light will form a diffuse spots in the retina. When the diameter of the  
76 diffuse spots is longer than or equal to  $B$ , two cone cells will be excited, and may thus be perceived.

77 The following formulae can be derived from Fig. 1:

78 
$$\frac{B}{1000 \times x} = \frac{\left(\frac{1}{(A-y)} - \frac{1}{A}\right)}{\frac{1}{A-y}} \quad (1)$$

79 
$$\frac{B}{1000 \times x} = 1 - \frac{A-y}{A} \quad (2)$$

80 
$$\frac{B}{1000 \times x} = \frac{y}{A} \quad (3)$$

81 
$$y = \frac{A \times B}{1000 \times x} \quad (4)$$

82 By substituting the total diopter of human eye, the diameter of cone cell and the pupil diameter  
83 in Formula (4), we can derive the resolution limit of human eye to spherical lens change. Since the  
84 value of  $y$  is very small, the influence of the vertex distance on the Formula (1) can be ignored

### 85 **Clinical validation of the resolution limit of human eye to spherical lens change**

#### 86 **Study participants**

87 The data were prospectively collected from myopia volunteers who visited Beijing Tongren  
88 Hospital from September 2020 to September 2021. The research was approved by the Human  
89 Studies Committee at Beijing Tongren Hospital (Beijing, China) in accordance with the Code of  
90 Ethics of the World Medical Association (registration number: ChiCTR2100047074). Subjects  
91 signed a statement of informed consent prior to their participation in the study. Patient's inclusion  
92 criteria were as follows: (1) patients with myopia not more than -6D, with corrected visual acuity  $\geq$   
93 1.0; (2) those having astigmatism with rule and  $\leq 0.25$ D; and (3) those having good compliance and  
94 able to complete the optometry, and red-green balance check. Exclusion criteria were as follows: (1)  
95 Patients complicated with heterotropia, amblyopia or ocular infection and other eye diseases; (2)  
96 those with a history of ocular trauma; (3) those undergoing surgery or other corrective therapy;  
97 and/or (4) those with refractive errors caused by genetic or congenital factors.

#### 98 **Examination procedures**

##### 99 **Adjust the spherical power at an interval of 0.25D to find the red-green balance point**

100 Standard subjective refraction was performed using a standard phoropter. The monocular best

101 vision sphere was determined using the Duochrome chart to ensure the circle of least confusion was  
102 on the retina before conducting Jackson Cross Cylinder (JCC). The circle of least confusion was  
103 maintained on the retina as cylinder power was increased. Once cylinder power and axis were  
104 calculated, the sphere was refined to best-corrected visual acuity (BCVA) with minimum minus  
105 power. Binocular balance using alternate occlusion technique was then conducted to best binocular  
106 VA to BCVA with minimum minus power.

107 Binocular balanced refraction results were placed in a trial frame and the eye not being tested was  
108 occluded. Subjects were asked to give a response as to whether the letters on the red or green side  
109 of the Duochrome were clearer. If the subject reported the red side being clearer, minus power was  
110 added in 0.25D steps until equality between red and green was achieved. If the subject reported the  
111 green side being clearer, then plus 0.75D was added so that red became clearer. The same step as  
112 previously described for when the side was clearer was then performed. The final sphere was where  
113 equality was first achieved between the red and green letters of the Duochrome. If equality could  
114 not be achieved, then the final sphere was the point where the next 0.25D change made green clearer.  
115 The final sphere, and previously calculated cylindrical power and axis were recorded for the final  
116 prescription.

#### 117 **Verify the resolution limit of change in spherical power**

118 Starting from the diopter of red-green balance point of equal clarity obtained by adjusting the  
119 spherical power at an interval of 0.25D, the diopter of spherical power was increased and decreased  
120 by one time of resolution limit, respectively. The volunteers were asked for any changes in the clarity  
121 of the red and green optotypes either from equal clarity to green clarity or red clarity. If there was  
122 no change, the point of equal clarity was used as the starting point again, and the diopter of spherical  
123 power was changed by 2 times the resolution limit. The volunteers were then asked for any changes  
124 in the clarity of optotypes. If still no change, the point of equal clarity was taken as the starting point  
125 to further increase the range of changes in the diopter of spherical power (an integer multiple of the  
126 resolution limit) until the clarity of optotypes changed.

127 In case of failure to identify the red-green balance point of equal clarity by adjusting the spherical  
128 power at an interval of 0.25D, the maximum diopter of red clarity (an increase of -0.25D to be green

129 clarity) should be taken as the starting point, and the resolution limit as the interval to find the point  
130 of equal clarity. After identifying the point of equal clarity, the limit of differences in the visually  
131 resolved diopter of spherical power could be validated following the above steps. If the point of  
132 equal clarity was still not found at the interval of the resolution limit, the diopter of spherical power  
133 was increased by one time the resolution limit from the maximum diopter of red clarity to get green  
134 clarity, and the volunteer's resolution limit was denoted as 1/2 of the resolution limit.

135 The prescription and the best corrected visual acuity were obtained by adjusting the spherical  
136 power at an interval of 0.25D and the resolution limit, respectively. The prescription of spherical  
137 power was determined according to the following principles: In case of a red-green balance point,  
138 the diopter of equal clarity is taken as the prescription diopter of spherical power. In absence of the  
139 red-green balance point, the maximum diopter of red clarity is taken as the prescription diopter of  
140 spherical power. The two sets of trial case lenses were of the same substrate material, manufacturing  
141 process and manufacturer (Minghao Technology (Beijing) Co., Ltd.). The visual acuity chart was  
142 an international standard one, and the recorded values were converted to the logarithm of the  
143 minimum angle of resolution (LogMAR).

#### 144 **Statistical analysis**

145 Before study initiation, we calculated the necessary sample size to ensure feasibility, we  
146 recruited 30 volunteers to observe the resolution limit of discernible change in spherical power. The  
147 mean resolution limit of change in spherical power was  $0.05 \pm 0.01$ . The test level was 0.05 and the  
148 test power was 0.80, 110 volunteers were needed based on the following sample size calculation  
149 formula. ( $\delta$ =allowable error,  $\alpha$ =inspection level,  $\sigma$ =standard deviation)

$$150 \quad N = \left( \frac{Z_{1-\frac{\alpha}{2}} * \sigma}{\delta} \right)^2 \quad (5)$$

151 SPSS 20.0 (IBM, Armonk NY) statistical software was used for analysis. Statistical significance  
152 was set at  $p \leq 0.05$ . For continuous variables, data are presented as mean  $\pm$  SD. Distributional  
153 normality was tested between different groups. The single-sample t-test was used to compare the  
154 theoretically derived resolution limit and the actual resolution, and the paired t-test was used to test  
155 the comparison of the spherical equivalent prescription and corrected visual acuity.

156 **Results**

157 **The theoretically derived resolution limit of human eye to spherical lens change**

158 When the total diopter of a human eye was 60.00D, the diameter of cone cell of  $3\ \mu\text{m}^{[4]}$ , and pupil  
159 diameter of 4 mm, they were substituted into Formula (4). The theoretically derived resolution limit  
160 was 0.05D, and the manufacturing interval of new spherical-power trial case lenses in clinical  
161 validation was set at 0.05D.

162 **Clinical validation of the theoretically derived resolution limit of human eye to spherical lens**  
163 **change**

164 As shown in Table 1, a total of 119 volunteers were enrolled in this study, with an average age of  
165  $23.7\pm 2.3$  years. The probability of achieving red-green balance when the spherical power was  
166 adjusted at an interval of 0.25D was much lower than that when the spherical power was adjusted  
167 at 0.05D.

168 The resolution limit that volunteers can actually resolve is shown in Table 2. Since the volunteers  
169 were myopic, increasing the diopter of spherical power from the point of equal clarity was  
170 equivalent to undercorrection, and the volunteers were required to observe whether the red  
171 optotypes became clearer. Whereas, decreasing the diopter of spherical power from the point of  
172 equal clarity was equivalent to overcorrection, and the volunteers were required to observe whether  
173 the green optotypes became clearer. It can be seen from the results that there is no difference between  
174 the theoretically derived value and the actual resolution when the diopter of spherical power is  
175 increased, but of difference when the diopter of spherical power is decreased. The right eye ( $t=$   
176  $4.206$ ,  $P=0.000$ ) and left eye ( $t=-2.993$ ,  $P=0.003$ ) were more likely to detect the changes in the  
177 diopter of spherical power on a red background.

178 As shown in Table 3, 98.3% of the right eyes in volunteers could resolve the changes in 0.05D of  
179 spherical power with the addition of the spherical power and 78.9% with the decrease of the  
180 spherical power; and 96.7% of the left eyes could resolve the changes in 0.05D of spherical power  
181 with the addition of spherical power and 83.2% with the decrease of spherical power.

182 Table 4 shows the prescription spherical equivalent and corrected visual acuity when the spherical

183 power are adjusted at intervals of 0.25D and 0.05D. The 0.25D group was undercorrected, and the  
184 spherical equivalent and corrected visual acuity were significantly lower than those in the 0.05D  
185 group.

## 186 **Discussion**

187 In 1865, the diopter was defined as the unit of optometry (at 1D interval) at an international  
188 ophthalmology conference in Heidelberg<sup>[7]</sup>. In 1900, the trial lenses at an interval of 0.25D appeared,  
189 greatly improving the effect of rectifying ametropia with eyeglasses. With the popularization of  
190 resin lens and computer numerical control (CNC) free-form surface machining, the machining  
191 accuracy of lens has been greatly improved from that 100 years ago and we can produce lenses at  
192 intervals of less than 0.25D nowadays.

193 Optometry aims to determine the lens power needed to achieve the BCVA. This power is defined  
194 by forming a circle of least confusion (COLC) in the macula, so it depends critically on the focusing  
195 accuracy of optical lens and the subject's ability to identify test-objects of different clarities. The  
196 diopter value of ametropia is a continuous variable and the subjective optometry is to simulate the  
197 continuous variable by inserting trial lenses with different powers into a trial frame. When the  
198 diopter value is reached, the external parallel rays of light entering the eye form a COLC, thereby  
199 obtaining the BCVA. COLC cannot be formed in case of any difference between the variable and  
200 the power of inserted lenses, so the BCVA also depends on the resolution limit of discernible change  
201 in lens power. If the difference is less than the resolution limit, the BCVA will be obtained properly;  
202 otherwise, inaccurate value may be obtained. Therefore, adjusting the combination of trial lenses  
203 per resolution limit is relatively conducive to obtaining the BCVA.

204 The normal visual acuity changes with diameters of cone cells and pupils<sup>[8 9]</sup>. With the same  
205 optical model, we derive the formula for calculating the resolution limit of discernible change in  
206 spherical power. The diameters of cone cells in human eyes range from 0.5  $\mu\text{m}$  to 4  $\mu\text{m}$ <sup>[10]</sup>, and the  
207 pupil diameter ranges from 2 mm to 4 mm<sup>[11]</sup> in daytime, so the resolution limit theoretically ranges  
208 from 0.01D to 0.12 D. In this study, the cone cell diameter was assumed to be 3  $\mu\text{m}$  and the pupil  
209 diameter was 4 mm, thereby the resolution limit obtained was 0.05 D. If the cell diameter remains  
210 unchanged (3  $\mu\text{m}$ ) and the pupil diameter changes from 3 mm to 4.5 mm, the resolution limit



211 fluctuates between 0.06 D and 0.04 D.

212 When the COLC is formed by focusing on a test-object on monochrome background, it is often  
213 difficult to identify the change in test-object clarity due to lack of reference object. In 1927, Brown  
214 devised the red-green Duochrome test to solve the problem, which has been an important step of  
215 the SOP for optometry since 1950s<sup>[12-14]</sup>. For subjective optometry, the ideal result is that the visible  
216 light centered at a wavelength of about 570 nm is exactly focused on the retina, and the black  
217 characters on the red and green backgrounds should have the same clarity when the broad-band  
218 visible light passing through the corrective lens is focused on the retina<sup>[15 16]</sup>. In this study, to obtain  
219 more reliable results, the red-green balance test was used to assist volunteers in identifying changed  
220 clarity of the test-object after adjusting the spherical power.

221 As shown in Table 2, the theoretical resolution limit is in good agreement with the actually  
222 discernible diopter on the red background. Although the difference is only 0.01D, a significant  
223 difference is found between the theoretical resolution limit and the actually discernible diopter on  
224 the green background, which is related to the subjective preference of patients, which affects the  
225 results of the red-green balance test<sup>[17 18]</sup>. Study suggests that red test-object is easier to be perceived  
226 than green one<sup>[19 20]</sup>, so the background color also affects the activity of visual cortex. As shown in  
227 Table 3, more than 95% of people can discern a 0.05D change in spherical power on the red  
228 background, and about 80% of people can discern a 0.05D change in spherical power on the green  
229 background, which are consistent with the theoretical results. The discernible resolution limits of  
230 13-16% volunteers are less than 0.05D, which may be attributed to their smaller cone cell diameter  
231 or larger pupil diameter.

232 As shown in Table 4, the spherical equivalent and the BCVA of left and right eyes in the 0.25 D  
233 interval group are significantly lower than those in the 0.05 D interval group and under correction.  
234 The situation can be attributed to the fact that the 0.25 D interval group could only set the minimum  
235 diopter achieving clear red test-object as the prescribed diopter when the red-green balance cannot  
236 be achieved.

237 The factors affecting the results of red-green balance test include eye accommodation, patients'  
238 subjective preferences, cataract, pupil size and ambient brightness<sup>[21-23]</sup>. Our study shown that only

239 17.6% of right eyes and 12.6% of left eyes can achieve the red-green balance when spherical power  
240 is adjusted at an interval of 0.25D. These volunteers with cataract, abnormal pupil and other  
241 abnormalities had been excluded before test. After adjustment of the interval to 0.05D, the red-green  
242 balance rate of both eyes increasing to 84% in the same experimental environment indicates that the  
243 adjustment interval of spherical power is critical to the red-green balance. As shown in Table 2, the  
244 change in spherical power to turn clear test-object on red background to that on green background  
245 is about 0.11D. Accordingly, it is difficult to achieve the red-green balance by adjusting the spherical  
246 power at an interval of 0.25D, unless the power achieving red-green balance is an integral multiple  
247 of 0.25D. Liu et al.<sup>[24]</sup> carried out a study on necessity of red-green balance test in subjective  
248 optometry and found there was no difference in results between the patients subject to red-green  
249 balance test and those free from the test. However, the spherical power was adjusted at an interval  
250 of 0.25D and different results may be obtained if the red-green balance rate is improved by adjusting  
251 the spherical power at an interval of 0.05D.

252 The major limitations of this study are that we only observed the short-term influence of different  
253 intervals on corrected visual acuity during optometry, so we will continue to explore the long-term  
254 influence of eyeglasses made with optometry prescription obtained by adjusting spherical power at  
255 an interval of 0.05D on binocular balance, wearing comfort and myopia progression as there is  
256 evidence that full correction are beneficial for myopia control than under correction<sup>[2 25 26]</sup>.

257 In summary, this study is the first one that deduce theoretically and verify the resolution limit of  
258 human eye to spherical lens change. The results show that different intervals of trial lens  
259 significantly influence the results of the refraction and Duochrome test. The 0.05 D interval group  
260 produces a more accurate refraction and a better visual acuity, which is linked to a higher rate of  
261 red-green balance. This study provides a great potential for future improvement of refraction  
262 technique and accuracy.

263

## 264 **ACKNOWLEDGEMENTS**

265 The authors acknowledge the support from Beijing Advanced Innovation Center for Big Data-  
266 Based Precision Medicine. The authors also thank Wenhua Wang, Hengheng Tang, Weiwei Hao

267 for their help of investigation.

## 268 **Source of Funding**

269 The authors acknowledge the support from the Beijing Advanced Innovation Center for Big Data-  
270 Based Precision Medicine and Beijing Municipal Science and Technology Project  
271 (Z201100005520042)

## 272 **Conflict of Interest**

273 The authors declare no conflict of interest.

274

## 275 **References**

- 276 1. Logan NS, Wolffsohn JS. Role of un-correction, under-correction and over-correction of myopia as a  
277 strategy for slowing myopic progression. *Clin Exp Optom* 2020;**103**(2):133-37 doi:  
278 10.1111/cxo.12978[published Online First: Epub Date]].
- 279 2. Chung K, Mohidin N, O'Leary DJ. Undercorrection of myopia enhances rather than inhibits myopia  
280 progression. *Vision Res* 2002;**42**(22):2555-9 doi: 10.1016/s0042-6989(02)00258-4[published Online  
281 First: Epub Date]].
- 282 3. Carlson NB, Kurtz D, Hines C. *Clinical procedures for ocular examination*: McGraw-Hill New  
283 York, 2004.
- 284 4. Gottfried R. *My sociology: An introduction for today's students*: Routledge, 2018.
- 285 5. Ilardi V. *Renaissance vision from spectacles to telescopes*: American Philosophical Society, 2007.
- 286 6. Goss DA. Historical Note on Subjective Refraction, Trial Lens Sets, and Phoropters. *HINDSIGHT:*  
287 *Journal of Optometry History* 2015;**46**(2):18
- 288 7. Bennett AG. An historical review of optometric principles and techniques. *Ophthalmic and*  
289 *Physiological Optics* 1986;**6**(1):3-21
- 290 8. Weale RA. Limits of human vision. *Nature* 1961;**191**:471-3 doi: 10.1038/191471a0[published  
291 Online First: Epub Date]].
- 292 9. Amesbury EC, Schallhorn SC. Contrast Sensitivity and Limits of Vision. *International*  
293 *Ophthalmology Clinics* 2003;**43**(2):31-42
- 294 10. Simoncelli E. Foundations of vision, 1996.
- 295 11. Winn B, Whitaker D, Elliott DB, Phillips NJ. Factors affecting light-adapted pupil size in normal  
296 human subjects. *Invest Ophthalmol Vis Sci* 1994;**35**(3):1132-7
- 297 12. Brinkbo B. Duochrome test as an aid in determinations of refraction. *Acta Ophthalmol (Copenh)*  
298 1954;**32**(5):585-8
- 299 13. Gantz L, Schrader S, Ruben R, Zivotofsky AZ. Can the red-green duochrome test be used prior to  
300 correcting the refractive cylinder component? *PLoS One* 2015;**10**(3):e0118874 doi:  
301 10.1371/journal.pone.0118874[published Online First: Epub Date]].
- 302 14. Colligon-Bradley P. Red-green duochrome test. *J Ophthalmic Nurs Technol* 1992;**11**(5):220-2
- 303 15. Atchison DA, Smith G. Chromatic dispersions of the ocular media of human eyes. *J Opt Soc Am A*  
304 *Opt Image Sci Vis* 2005;**22**(1):29-37 doi: 10.1364/josaa.22.000029[published Online First: Epub  
305 Date]].
- 306 16. Bennet A. The theory of Bi-chromatic tests. *Optician* 1963;**146**:291-96
- 307 17. Tsang SN, Chan AH, Yu RF. Effect of color contrast on visual lobe shape characteristics. *Percept*  
308 *Mot Skills* 2013;**116**(2):435-55 doi: 10.2466/24.27.Pms.116.2.435-455[published Online First: Epub  
309 Date]].
- 310 18. Racey C, Franklin A, Bird CM. The processing of color preference in the brain. *Neuroimage*  
311 2019;**191**:529-36 doi: 10.1016/j.neuroimage.2019.02.041[published Online First: Epub Date]].
- 312 19. Hu K, De Rosa E, Anderson AK. Yellow is for safety: perceptual and affective perspectives.  
313 *Psychol Res* 2020;**84**(7):1912-19 doi: 10.1007/s00426-019-01186-2[published Online First: Epub

- 314 Date]].
- 315 20. Pfäffli OA, Tamási B, Hanson JVM, Gerth-Kahlert C. Colour vision testing in young children with  
316 reduced visual acuity. *Acta Ophthalmol* 2020;**98**(1):e113-e20 doi: 10.1111/aos.14219[published Online  
317 First: Epub Date]].
- 318 21. Rosenfield M, Aggarwala KR, Raul C, Ciuffreda KJ. Do changes in pupil size and ambient  
319 illumination affect the duochrome test? *J Am Optom Assoc* 1995;**66**(2):87-90
- 320 22. Rosenfield M, Aggarwala K, Raul C, Ciuffreda KJ. Do changes in pupil size and ambient  
321 illumination affect the duochrome test? *Journal of the American Optometric Association*  
322 1995;**66**(2):87-90
- 323 23. Cheng C, Parreno J, Nowak RB, et al. Age-related changes in eye lens biomechanics, morphology,  
324 refractive index and transparency. *Aging (Albany NY)* 2019;**11**(24):12497
- 325 24. Feng. LLC. Necessity study of duochrome test in subjective optometry *International journal of*  
326 *ophthalmology* 2020;**20**(2):3
- 327 25. Adler D, Millodot M. The possible effect of undercorrection on myopic progression in children.  
328 *Clin Exp Optom* 2006;**89**(5):315-21 doi: 10.1111/j.1444-0938.2006.00055.x[published Online First:  
329 Epub Date]].
- 330 26. Vasudevan B, Esposito C, Peterson C, Coronado C, Ciuffreda KJ. Under-correction of human  
331 myopia--is it myopigenic?: a retrospective analysis of clinical refraction data. *J Optom* 2014;**7**(3):147-  
332 52 doi: 10.1016/j.optom.2013.12.007[published Online First: Epub Date]].
- 333
- 334

335

Table 1 Basic information of included volunteers

|                                                                                | Right eye       | Left eye        |
|--------------------------------------------------------------------------------|-----------------|-----------------|
| Gender                                                                         |                 |                 |
| Male                                                                           | 48              |                 |
| Female                                                                         | 71              |                 |
| Age                                                                            | 23.7±2.3        |                 |
| Red-green balance rate of the spherical power adjusted at an interval of 0.25D | 17.6% (21 eyes) | 12.6% (15 eyes) |
| Red-green balance rate of the spherical power adjusted at an interval of 0.05D | 84% (100 eyes)  | 84% (100 eyes)  |

336

337

Table 2 Limit of discernible change in spherical power

|                                                               | Actual resolution<br>(D) | Theoretically<br>derived value (D) | t      | P     |
|---------------------------------------------------------------|--------------------------|------------------------------------|--------|-------|
| Increase in diopter of spherical<br>power (undercorrection)   |                          |                                    |        |       |
| Right eye                                                     | 0.05±0.01                | 0.05                               | -1.679 | 0.096 |
| Left eye                                                      | 0.05±0.02                | 0.05                               | -0.911 | 0.364 |
| Decrease in diopter of<br>spherical power<br>(overcorrection) |                          |                                    |        |       |
| Right eye                                                     | 0.06±0.04                | 0.05                               | 3.336  | 0.001 |
| Left eye                                                      | 0.06±0.03                | 0.05                               | 2.334  | 0.021 |

338

339

340

341 Table 3 Distribution of the resolution limits for changes in the actually resolved diopter of  
 342 spherical power

|        | OD                               |                                  | OS                               |                                  |
|--------|----------------------------------|----------------------------------|----------------------------------|----------------------------------|
|        | Increase in spherical lenses (%) | Decrease in spherical lenses (%) | Increase in spherical lenses (%) | Decrease in spherical lenses (%) |
| 0.025D | 16 (13.4%)                       | 16 (13.4%)                       | 19 (16.0%)                       | 19 (16.0%)                       |
| 0.05D  | 101 (84.9%)                      | 78 (65.5%)                       | 96 (80.7%)                       | 80 (67.2%)                       |
| 0.10D  | 1 (0.8%)                         | 22 (18.5%)                       | 2 (1.7%)                         | 17(14.3%)                        |
| 0.15D  | 1 (0.8%)                         | 2 (1.7%)                         | 2 (1.7%)                         | 2 (1.7%)                         |
| 0.20D  | 0 (0.0%)                         | 1 (0.8%)                         | 0 (0.0%)                         | 0 (0.0%)                         |
| 0.25D  | 0 (0.0%)                         | 0 (0.0%)                         | 0 (0.0%)                         | 1 (0.8%)                         |
| Total  | 119 (100.0%)                     | 119 (100.0%)                     | 119 (100.0%)                     | 119 (100.0%)                     |

343

344 Table 4 Prescription and corrected visual acuity for adjusting spherical power at 0.25D and

345 0.05D

|                      |          | at an interval of | of | at an interval of | t     | P     |
|----------------------|----------|-------------------|----|-------------------|-------|-------|
|                      |          | 0.25D             |    | 0.05D             |       |       |
| Spherical equivalent | OD       | -3.50±1.54        |    | -3.59±1.55        | 9.656 | 0.000 |
|                      | (D)      |                   |    |                   |       |       |
|                      | OS       | -3.23±1.67        |    | -3.31±1.67        | 7.978 | 0.000 |
| BCVA                 | OD       | -0.02±0.06        |    | -0.04±0.07        | 6.729 | 0.000 |
|                      | (LogMAR) |                   |    |                   |       |       |
|                      | OS       | -0.04±0.06        |    | -0.07±0.06        | 8.825 | 0.000 |

346



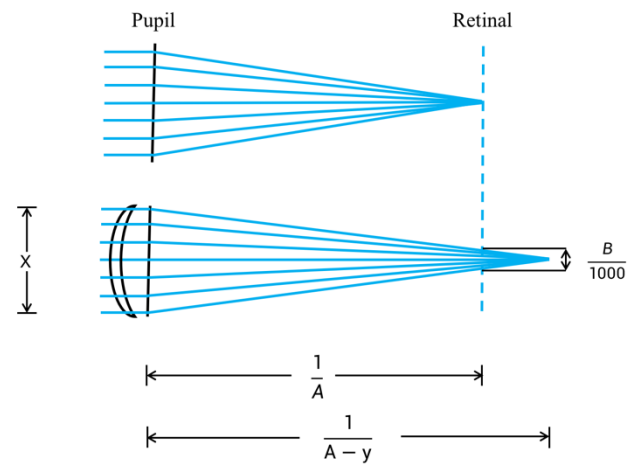

Figure 1 The optical model of minimum limit of discernible change in spherical power
